# Supplementary material for: Comparison of human gastrocnemius forces predicted by Hill-type muscle models and estimated from ultrasound images
Source: Oxford University Press journal article supplement (doi:10.1242/jeb.154807), 2017-01-01
Supplement: jeb154807supp.pdf [file jeb154807supp.pdf]

**Table S1.** Characteristics of the 16 cyclists tested.

| Subject | Sex | Age (y) | Height (cm) | Body Mass (kg) | LG Max Isometric Force (N)* | MG Max Isometric Force (N)* | LG tendon Stiffness (N mm <sup>-1</sup> )† | MG tendon Stiffness (N mm <sup>-1</sup> )† |
|---------|-----|---------|-------------|----------------|-----------------------------|-----------------------------|--------------------------------------------|--------------------------------------------|
| 1       | M   | 29      | 186         | 90.85          | 674                         | 1179                        | 34.5                                       | 63.2                                       |
| 2       | M   | 28      | 167         | 68.00          | 588                         | 1028                        | 22.0                                       | 38.9                                       |
| 3       | M   | 33      | 175         | 68.00          | 546                         | 956                         | 36.2                                       | 50.0                                       |
| 4       | M   | 32      | 183         | 63.00          | 488                         | 854                         | 22.5                                       | 39.0                                       |
| 5       | M   | 37      | 173         | 71.80          | 599                         | 1047                        | 39.2                                       | 55.0                                       |
| 6       | M   | 30      | 179         | 70.30          | 555                         | 972                         | 24.5                                       | 41.8                                       |
| 7       | M   | 47      | 183         | 86.50          | 661                         | 1157                        | 42.7                                       | 59.1                                       |
| 8       | M   | 31      | 183         | 82.80          | 676                         | 1184                        | 26.3                                       | 41.2                                       |
| 9       | F   | 30      | 167         | 65.80          | 584                         | 1022                        | 34.5                                       | 73.6                                       |
| 10      | F   | 43      | 174         | 64.40          | 552                         | 966                         | 28.9                                       | 55.4                                       |
| 11      | F   | 24      | 171         | 65.80          | 571                         | 999                         | 27.8                                       | 52.0                                       |
| 12      | F   | 26      | 167         | 58.00          | 500                         | 874                         | 22.1                                       | 47.2                                       |
| 13      | F   | 22      | 160         | 51.30          | 474                         | 830                         | 25.3                                       | 43.4                                       |
| 14      | F   | 23      | 168         | 68.00          | 608                         | 1065                        | 29.5                                       | 58.8                                       |
| 15      | F   | 20      | 165         | 67.30          | 622                         | 1089                        | 26.9                                       | 42.4                                       |
| 16      | F   | 32      | 167         | 59.40          | 541                         | 948                         | 38.2                                       | 59.2                                       |

\* Estimates of the muscles' maximum isometric force-generating capacity based on the muscles' volumes (Handsfield et al., 2014) and optimal fibre lengths (Arnold et al., 2010), assuming a maximum isometric muscle stress  $\sigma_0$  of 225 kPa. (Spector et al., 1980; Roy et al., 1982).

†Linear region LG and MG AT stiffnesses were estimated as the proportion of the total AT stiffness contributed by each muscle based on ratio of the maximum force-generating capacity  $F_{\max}$  of either the LG or MG to the combined triceps surae maximum force.

**Table S2.** Chi-square test results for comparison of  $r^2$  and RMSE between one-element and two-element Hill-type muscle models.

| Cadence<br>(r.p.m.) | Load<br>(N m) | Coefficient of<br>determination, $r^2$ |              | RMSE                     |              |
|---------------------|---------------|----------------------------------------|--------------|--------------------------|--------------|
|                     |               | two-element<br>(% total)               | $p$ -value   | two-element<br>(% total) | $p$ -value   |
| 60                  | 44            | 46.9                                   | 0.73         | 37.5                     | 0.15         |
| 80                  | 14            | 59.4                                   | 0.29         | 28.1                     | 0.01         |
| 80                  | 26            | 62.5                                   | 0.16         | 43.8                     | 0.47         |
| 80                  | 35            | 65.6                                   | 0.07         | 43.8                     | 0.47         |
| 80                  | 44            | 59.4                                   | 0.29         | 46.9                     | 0.72         |
| 100                 | 26            | 71.9                                   | <b>0.01*</b> | 62.5                     | 0.15         |
| 120                 | 13            | 68.8                                   | <b>0.03*</b> | 68.8                     | <b>0.03*</b> |
| 140                 | 13            | 71.9                                   | <b>0.01*</b> | 68.8                     | <b>0.03*</b> |

Values in % total column indicate the number of times for the combined MG and LG results across individual subjects and pedalling conditions, as a %, that the two-element model performed better (higher  $r^2$  and lower RMSE) ( $n=16$ ). Differences were considered significant at the  $p<0.05$  level.

\*indicates  $p<0.05$

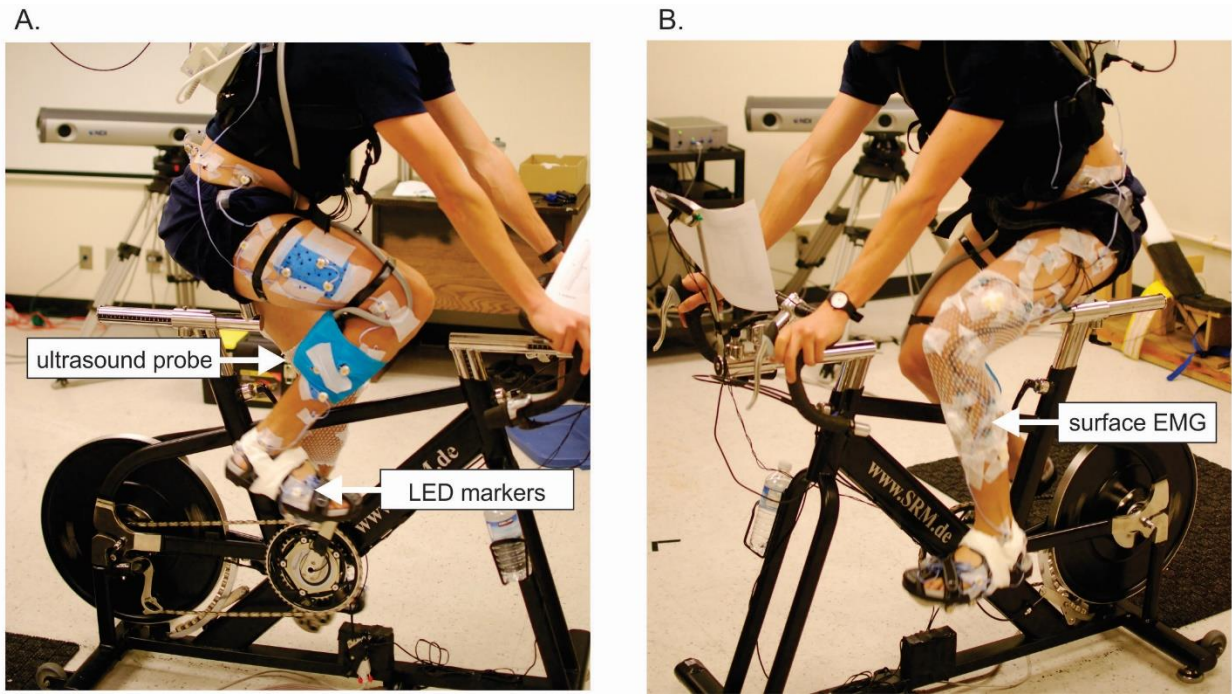

**Fig. S1.** Experimental set up displaying B-mode ultrasound probe positioned over the LG muscle belly to image muscle fascicles and LED motion capture markers to record kinematics (A) and surface EMG electrodes placed on contralateral limb to record simultaneous muscle excitations (B).

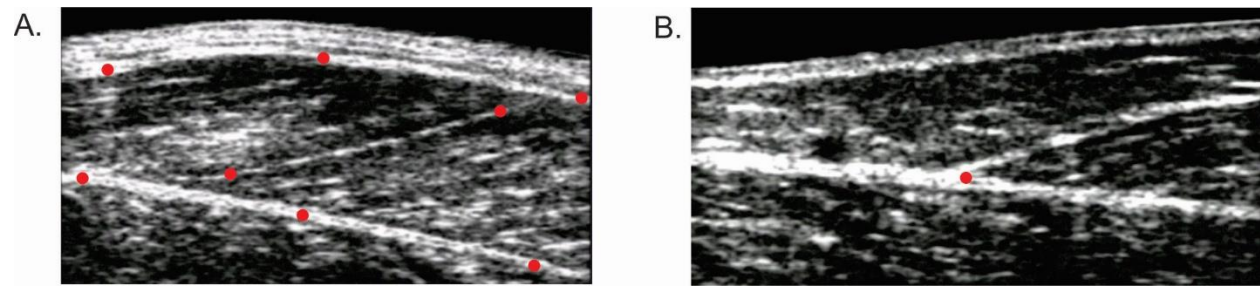

**Fig. S2.** B-mode ultrasound images of the MG muscle belly (A) and MG muscle-tendon junction (B). Red dots indicate digitized points that were used to determine time-varying fascicle lengths and pennation angles from (A) and tendon lengths from (B).

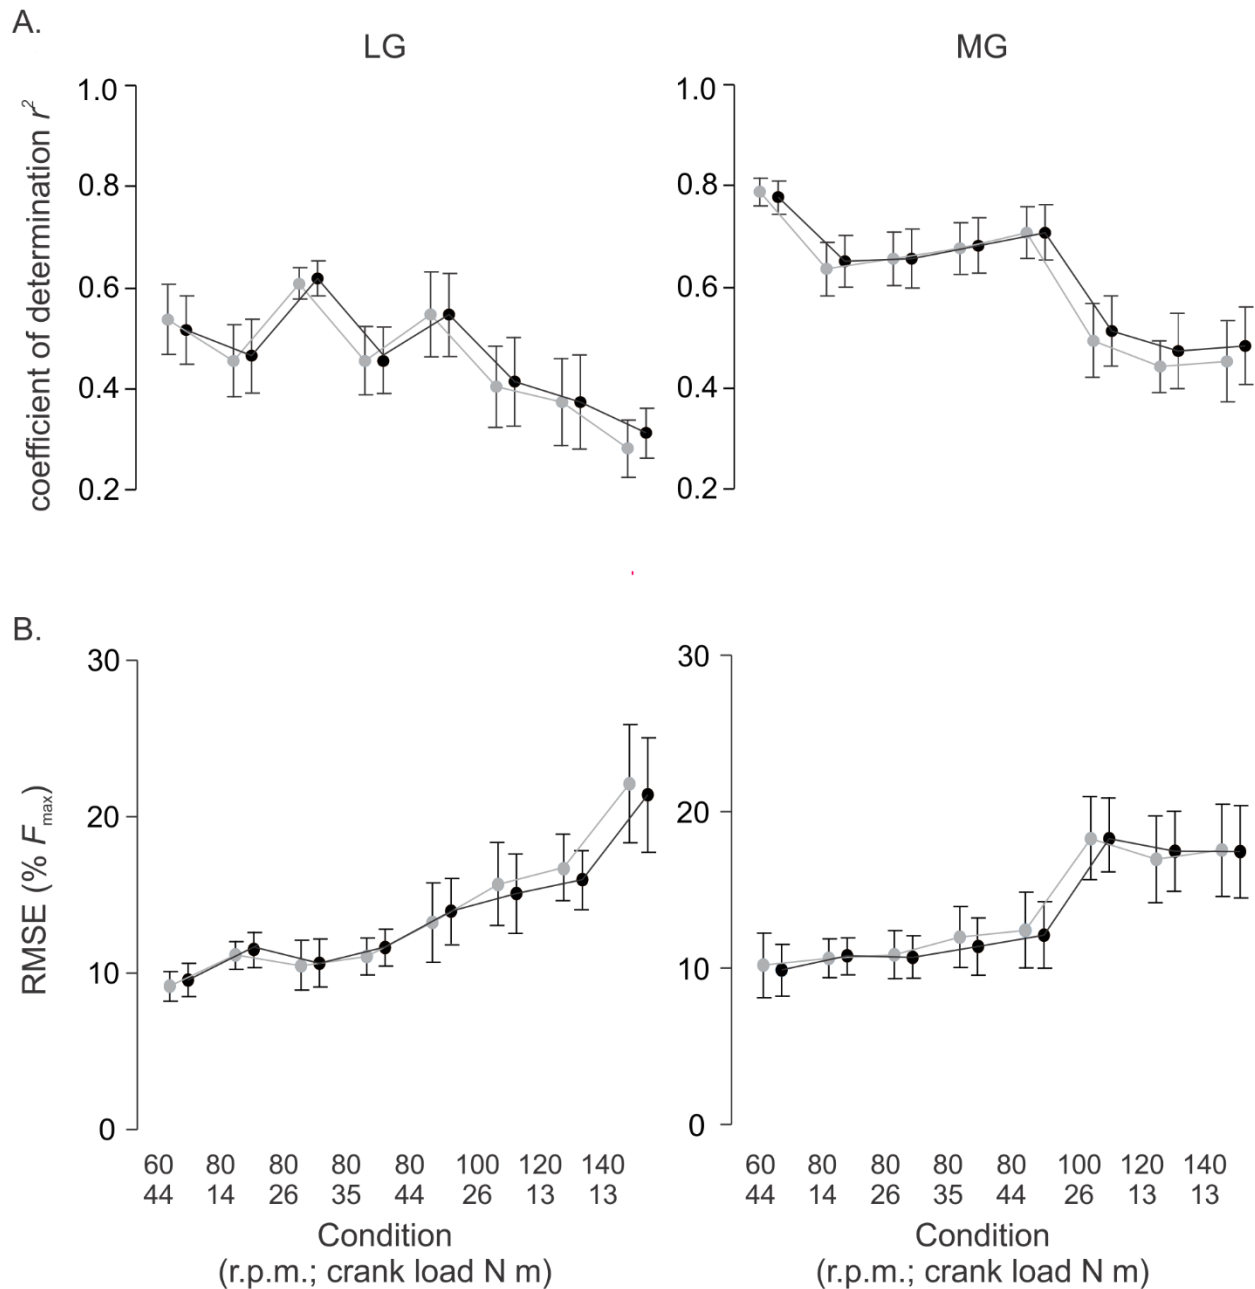

**Fig. S3.** Model predictions differ between muscles, pedalling conditions, and model type. Comparison of the one-element (grey) and two-element (black) Hill-type models using  $r^2$  (A) and RMSE (B) across the pedal cycle for the LG and MG. Data points shown represent the mean  $\pm$  SE across all subjects at each pedalling condition.
